# Supplementary material for: Insights into charge carrier dynamics in organo-metal halide perovskites: from neat films to solar cells
Source: Royal Society of Chemistry journal article supplement (doi:10.1039/c6cs00942e), 2017-01-01
Supplement: c6cs00942e1.pdf [file c6cs00942e1.pdf]

Electronic Supplementary Information for

# Insights into charge carrier dynamics in organo-metal halide perovskites: from neat films to solar cells

*Jiajun Peng,<sup>a</sup> Yani Chen,<sup>a</sup> Kaibo Zheng,<sup>b,c,\*</sup> Tõnu Pullerits,<sup>b</sup> and Ziqi Liang<sup>a,\*</sup>*

<sup>a</sup> Department of Materials Science, Fudan University, Shanghai 200433, China.

E-mail: zqliang@fudan.edu.cn

<sup>b</sup> Department of Chemical Physics and NanoLund, Lund University, Box 124, 22100 Lund, Sweden

E-mail: kaibo.zheng@chemphys.lu.se, tonu.pullerits@chemphys.lu.se

<sup>c</sup> Gas Processing Center, College of Engineering, Qatar University, PO Box 2713, Doha, Qatar

E-mail: kaibo.zheng@chemphys.lu.se

**Table S1.** Transport parameters calculated by various transient and steady-state measurements

| Sample                                                                            | Method     | Frequency (Hz)                                 | light pulse (ns)    | Time window or resolution | Light Intensity (mJ cm <sup>-2</sup> ) | Wavelength (nm) | $\mu$ (cm <sup>2</sup> V <sup>-1</sup> s <sup>-1</sup> ) | Carrier lifetime ( $\mu$ s) | Diffusion coefficient (cm <sup>2</sup> s <sup>-1</sup> ) | Diffusion length ( $\mu$ m) | Carrier concentration or trap density (cm <sup>-3</sup> ) | Conductivity ( $\Omega^{-1}$ cm <sup>-1</sup> ) | Ref.                                            |
|-----------------------------------------------------------------------------------|------------|------------------------------------------------|---------------------|---------------------------|----------------------------------------|-----------------|----------------------------------------------------------|-----------------------------|----------------------------------------------------------|-----------------------------|-----------------------------------------------------------|-------------------------------------------------|-------------------------------------------------|
| 1-MAPbI <sub>3</sub> film                                                         | CELIV      | 2.5 × 10 <sup>4</sup>                          | 3–7                 |                           | 0.1                                    | 532             | 3.2 × 10 <sup>-4</sup>                                   |                             |                                                          |                             |                                                           |                                                 | ACS Appl. Mater. Interfaces, 2015, 7, 4471–4475 |
| 1-MAPbI <sub>3</sub> /PCBM bilayer                                                | CELIV      | 2.5 × 10 <sup>4</sup>                          | 3–7                 |                           | 0.1                                    | 532             | 7.1 × 10 <sup>-4</sup>                                   |                             |                                                          |                             |                                                           |                                                 | ACS Appl. Mater. Interfaces, 2015, 7, 4471–4475 |
| 2-MAPbI <sub>3</sub> /PCBM bilayer                                                | CELIV      | 2.5 × 10 <sup>4</sup>                          | 3–7                 |                           | 0.1                                    | 532             | 5.29 × 10 <sup>-4</sup>                                  |                             |                                                          |                             |                                                           |                                                 | ACS Energy Lett., 2016, 1, 1000–1006            |
| MAPbI <sub>3</sub> film                                                           | CELIV      | 2.5 × 10 <sup>4</sup>                          | 3 × 10 <sup>4</sup> |                           | < 5 × 10 <sup>-5</sup>                 | 473             | 0.67 × 10 <sup>-3</sup>                                  |                             |                                                          |                             |                                                           |                                                 | Nano Energy, 2016, 27, 569–576.                 |
| HC 2D {(MA) <sub>n-1</sub> Pb <sub>n</sub> I <sub>3n+1</sub> } <sup>2-</sup> film | Dark-CELIV | 3.1 × 10 <sup>4</sup>                          |                     |                           |                                        |                 | 1.07 × 10 <sup>-3</sup>                                  |                             |                                                          |                             |                                                           |                                                 | Nature, 2016, 536, 312–316                      |
| 2D {(MA) <sub>n-1</sub> Pb <sub>n</sub> I <sub>3n+1</sub> } <sup>2-</sup> film    | Dark-CELIV | 3.1 × 10 <sup>4</sup>                          |                     |                           |                                        |                 | 0.011                                                    |                             |                                                          |                             |                                                           |                                                 | Nature, 2016, 536, 312–316                      |
| MAPbI <sub>3</sub>                                                                | CELIV      | 2.5 × 10 <sup>4</sup><br>1.0 × 10 <sup>4</sup> | 4                   |                           | 0.062–2.47                             | 532             | 0.0015                                                   |                             |                                                          |                             |                                                           |                                                 | Adv. Energy Mater. 2017, 1602610                |
| 1-MAPbI <sub>3</sub> /PCBM bilayer                                                | TOF        | 10                                             | 3–7                 |                           | 0.1                                    | 532             | 10 <sup>-4</sup> –10 <sup>-3</sup>                       |                             |                                                          |                             |                                                           |                                                 | ACS Appl. Mater. Interfaces, 2015, 7, 4471–4475 |
| 2-MAPbI <sub>3</sub> /PCBM bilayer                                                | TOF        | 10                                             | 3–7                 |                           | 0.1                                    | 532             | 5.4 × 10 <sup>-4</sup><br>4.5 × 10 <sup>-4</sup>         |                             |                                                          |                             |                                                           |                                                 | ACS Energy Lett., 2016, 1, 1000–1006            |
| MAPbBr <sub>3</sub> single crystals                                               | TOF        | 200                                            | 5                   |                           |                                        | 355             | 8.65 × 10 <sup>-5</sup>                                  |                             |                                                          |                             |                                                           |                                                 | Science, 2015, 347, 519–522                     |
| MAPbI <sub>3</sub> single crystals                                                | TOF        | > 100                                          | 4                   |                           |                                        | 337             | 24.0                                                     |                             |                                                          |                             |                                                           |                                                 | Science, 2015, 347, 967–970                     |
| PbS-MAPbI <sub>3</sub> QDs                                                        | TOF        | 10                                             | 3–7                 |                           | 0.1                                    | 532             | 8.04 × 10 <sup>-5</sup>                                  |                             |                                                          |                             |                                                           |                                                 | Adv. Sci., 2016, 3, 1500432                     |
| PbS-MAPbI <sub>3</sub> /PbS-EDT QDs                                               | TOF        | 10                                             | 3–7                 |                           | 0.1                                    | 532             | 2.68 × 10 <sup>-5</sup>                                  |                             |                                                          |                             |                                                           |                                                 | Adv. Sci., 2016, 3, 1500432                     |
| MAPbI <sub>3</sub>                                                                | FET        |                                                |                     |                           |                                        |                 | 9.91 × 10 <sup>-5</sup>                                  |                             |                                                          |                             |                                                           |                                                 | Nat. Commun., 2015, 6, 7383                     |
|                                                                                   |            |                                                |                     |                           |                                        |                 | 1.04 × 10 <sup>-4</sup>                                  |                             |                                                          |                             |                                                           |                                                 |                                                 |
|                                                                                   |            |                                                |                     |                           |                                        |                 | 2.1 × 10 <sup>-2</sup>                                   |                             |                                                          |                             |                                                           |                                                 |                                                 |
|                                                                                   |            |                                                |                     |                           |                                        |                 | 7.2 × 10 <sup>-2</sup>                                   |                             |                                                          |                             |                                                           |                                                 |                                                 |

|                                                            |                      |      |                         |         |               |     |  |             |      |     |  |                                                  |                                            |      |                                                   |
|------------------------------------------------------------|----------------------|------|-------------------------|---------|---------------|-----|--|-------------|------|-----|--|--------------------------------------------------|--------------------------------------------|------|---------------------------------------------------|
| CH <sub>3</sub> NH <sub>2</sub> treated MAPbI <sub>3</sub> | FET                  |      |                         |         |               |     |  | 22.75       |      |     |  |                                                  |                                            |      | ACS Appl. Mater. Interfaces, 2016, 8, 31413–31418 |
| MAPbI <sub>3</sub> microplate crystals                     | FET                  |      |                         |         |               |     |  | 3<br>4      |      |     |  |                                                  |                                            |      | Adv. Mater., 2016, 29, 1601959                    |
| MAPbBr <sub>3</sub> single crystals                        | Hall                 |      |                         |         |               |     |  | 20–60       |      |     |  | 5 × 10 <sup>9</sup> –5 × 10 <sup>10</sup>        |                                            |      | Science 2015, 347, 519-522                        |
| MAPbI <sub>3</sub> single crystals                         | Hall                 |      |                         |         |               |     |  | 105         |      |     |  | 9 × 10 <sup>9</sup>                              |                                            |      | Science, 2015, 347, 967–970                       |
| MAPbI <sub>3</sub> single crystals                         | TPV or IS            | Nan  | 4                       | 1500 us | 10-100 mWcm-2 | 337 |  | 82 or 95    |      | 175 |  |                                                  |                                            |      | Science, 2015, 347, 967–970                       |
| MASnI <sub>3</sub> single crystals                         | Hall                 |      |                         |         |               |     |  | 200         |      |     |  | 9 × 10 <sup>17</sup>                             | 0.01–0.04                                  |      | J. Solid State Chem., 2013, 205, 39–43            |
| MAPbI <sub>3</sub> film                                    | Hall                 |      |                         |         |               |     |  |             |      |     |  | 4–10 × 10 <sup>13</sup>                          |                                            |      | Energy Environ. Sci., 2014, 7, 2619–2623          |
| vapor- and solution-grown MAPbI <sub>3</sub> films         | Hall                 |      |                         |         |               |     |  | 0.5         | 30   | 23  |  | 10 <sup>15</sup> –10 <sup>16</sup>               | 10 <sup>-8</sup> –10 <sup>-7</sup>         |      | Nat. Commun., 2016, 7, 12253                      |
| MAPbBr <sub>3</sub> single crystals                        | Hall                 |      |                         |         |               |     |  | 60          | 2700 | 650 |  | 10 <sup>11</sup> –10 <sup>12</sup>               | 10 <sup>-6</sup> –10 <sup>-5</sup>         |      | Nat. Commun., 2016, 7, 12253                      |
| MAPbBr <sub>3</sub> single crystals                        | Hall                 |      |                         |         |               |     |  | 10<br>20    |      |     |  | 10 <sup>9</sup> –10 <sup>12</sup>                | 5 × 10 <sup>-9</sup> –8 × 10 <sup>-7</sup> |      | Adv. Mater. 2016, 28, 6509–6514                   |
| MAPbI <sub>3</sub> single crystals                         | SCLC                 |      |                         |         |               |     |  | 164<br>24.8 |      |     |  | 3.6 × 10 <sup>10</sup><br>4.5 × 10 <sup>10</sup> |                                            |      | Science, 2015, 347, 967–970                       |
| MAPbI <sub>3</sub> polycrystalline films                   | SCLC                 |      |                         |         |               |     |  |             |      |     |  | 2.0 × 10 <sup>15</sup>                           |                                            |      | Science, 2015, 347, 967–970                       |
| MAPbBr <sub>3</sub> single crystals                        | SCLC                 |      |                         |         |               |     |  | 38          |      |     |  | 5.8 × 10 <sup>9</sup>                            |                                            |      | Science, 2015, 347, 519–522                       |
| MAPbI <sub>3</sub> single crystals                         | SCLC                 |      |                         |         |               |     |  | 2.5         |      |     |  | 3.3 × 10 <sup>10</sup>                           | 1 × 10 <sup>-8</sup>                       |      | Science, 2015, 347, 519–522                       |
| α-phase FAPbI <sub>3</sub> single crystals                 | SCLC                 |      |                         |         |               |     |  | 4.4         |      |     |  | 6.2 × 10 <sup>11</sup>                           | 1.1 × 10 <sup>-7</sup>                     |      | Adv. Mater., 2016, 28, 2253–2258                  |
| MAPbBr <sub>3</sub> ISC                                    | SCLC and Hall effect |      |                         |         |               |     |  | 60          |      |     |  | 2 × 10 <sup>11</sup>                             | 2 × 10 <sup>-8</sup>                       |      | Nat. Commun., 2015, 6, 8724                       |
| MAPbI <sub>3</sub> thin film                               | TRPL                 | 500  | 7                       | 80 ns   | 0.025         | 532 |  | 0.010       |      |     |  |                                                  |                                            |      | J. Phys. Chem. Lett., 2016, 7, 2450–2455          |
| MAPbI <sub>x</sub> Cl <sub>3-x</sub> thin film             | TRPL                 | ??   |                         |         |               |     |  |             |      |     |  | > 0.100                                          |                                            |      | Energy Environ. Sci., 2015, 8, 208–215            |
| MAPbI <sub>3</sub> polycrystalline film                    |                      |      |                         |         |               |     |  |             |      |     |  | 4.5 × 10 <sup>-3</sup>                           |                                            |      |                                                   |
| MAPbI <sub>3</sub> /PCBM                                   | TRPL                 | 1000 | 0.15 × 10 <sup>-3</sup> |         |               | 600 |  |             |      |     |  | 3.7 × 10 <sup>-4</sup>                           | 0.011                                      | 0.09 |                                                   |
| MAPbI <sub>3</sub> / Spiro-OMeTAD                          |                      |      |                         |         |               |     |  |             |      |     |  | 6.4 × 10 <sup>-4</sup>                           | 0.017                                      | 0.13 | Science, 2013, 342, 344–347                       |

|                                                                            |           |                          |                         |         |                                         |        |                                    |                          |                      |        |                                           |
|----------------------------------------------------------------------------|-----------|--------------------------|-------------------------|---------|-----------------------------------------|--------|------------------------------------|--------------------------|----------------------|--------|-------------------------------------------|
| MAPbI <sub>x</sub> Cl <sub>3-x</sub> film                                  | TRPL      | 1 × 10 <sup>6</sup>      | 6 × 10 <sup>-3</sup>    |         | 6.5 × 10 <sup>15</sup> cm <sup>-3</sup> |        | 10 <sup>-1</sup> -10 <sup>-2</sup> | 7 × 10 <sup>-3</sup>     | 0.04–0.05<br>0.1–2.5 | 1      | Adv. Funct. Mater., 2016, 26, 4283–4292   |
| MAPbI <sub>3</sub>                                                         | TRPL      | 5 × 10 <sup>4</sup>      | 3 × 10 <sup>-4</sup>    | 20 ps   | 2 × 10 <sup>-4</sup>                    |        |                                    | 0.14                     |                      |        | J. Am. Chem. Soc., 2014, 136, 11610–11613 |
| MAPbI <sub>3</sub> polycrystalline films                                   | TRPL      | 1 × 10 <sup>6</sup>      | 1.4 × 10 <sup>-4</sup>  |         | 4 × 10 <sup>16</sup> cm <sup>-3</sup>   | 700    |                                    | 0.02–0.1                 |                      |        | J. Am. Chem. Soc., 2014, 136, 17730–17733 |
| MAPbI <sub>x</sub> Cl <sub>1-x</sub> film                                  | TRPL      | 0.3–10 × 10 <sup>6</sup> |                         |         | 0.03                                    | 507    |                                    | 0.2727                   | 0.042,               | 1.069, | Science, 2013, 342, 341–344               |
| MAPbI <sub>3</sub> film                                                    |           |                          |                         |         |                                         |        |                                    | 9.6 × 10 <sup>-3</sup>   | 0.054                | 1.213  |                                           |
| MAPbBr <sub>3-x</sub> Cl <sub>x</sub> films                                | TRPL      | 100K                     | 1                       | 400 ns  | NAN                                     | 377    |                                    | 0.1–0.446                |                      |        | Chem. Commun., 2014, 50, 11727–11730      |
| MAPbI <sub>3-x</sub> Cl <sub>x</sub> /PMMA                                 | TRPL      | NAN                      | 0.1                     | 300 ns  | <0.1                                    | 635    |                                    | 0.35                     | 0.042,               | 1.069, | Energy Environ. Sci., 2014, 7, 1889–1894  |
| Al <sub>2</sub> O <sub>3</sub> /MAPbI <sub>3-x</sub> Cl <sub>x</sub> /PMMA |           |                          |                         |         |                                         |        |                                    | 0.02/0.32                |                      |        |                                           |
| TiO <sub>2</sub> /MAPbI <sub>3-x</sub> Cl <sub>x</sub> /PMMA               |           |                          |                         |         |                                         |        |                                    | 0.004                    |                      |        |                                           |
| TiO <sub>2</sub> /MAPbI <sub>3-x</sub> Cl <sub>x</sub> /Spiro-OMeTAD       |           |                          |                         |         |                                         |        |                                    | 0.002                    |                      |        |                                           |
| MAPbBr <sub>3</sub> single crystals                                        | TA + TRPL |                          | 0.7                     | ns–μs   |                                         | 355    |                                    | 0.041                    |                      | 3      | Science 2015, 347, 519-522                |
| MAPbI <sub>3</sub> single crystals                                         | TA + TRPL |                          | 0.8                     | ns–μs   |                                         | 633    |                                    | 0.375                    |                      | 17     | Science 2015, 347, 519-522                |
| MAPbI <sub>3</sub> /PCBM                                                   | TA        | 1000                     | 3.5 × 10 <sup>-5</sup>  |         | 1.4 × 10 <sup>-3</sup>                  | 450    |                                    | 0.022                    | 0.042,               | 1.069, | J. Phys. Chem. Lett., 2016, 7, 5056–5061  |
| MAPbI <sub>3</sub> /Spiro-OMeTAD                                           |           |                          |                         |         |                                         |        |                                    | 1.032                    |                      |        |                                           |
| MAPbI <sub>3</sub> films                                                   | TA        | 1000                     | 0.13E-3                 | 400 ps  | 0.019                                   | 377    |                                    | 6 × 10 <sup>-6</sup>     |                      |        | Energy Environ. Sci., 2015, 8, 208–215    |
| MAPbI <sub>3</sub>                                                         | TA        | 5 × 10 <sup>4</sup>      | 0.3 × 10 <sup>-3</sup>  |         | 2 × 10 <sup>-4</sup>                    | 1.8 eV |                                    | 8 × 10 <sup>-6</sup>     |                      |        | J. Am. Chem. Soc., 2014, 136, 11610–11613 |
| MAPbI <sub>x</sub> Cl <sub>1-x</sub> film                                  | TA        | 1000                     | 0.15E-3                 | 2000 ps | 0.0013                                  | 500    |                                    | 97, 105,                 |                      |        | Science, 2013, 342, 341–344               |
| MAPbI <sub>3</sub> thin film                                               | TA        | 1000                     | 0.13 × 10 <sup>-3</sup> |         | 8 × 10 <sup>-3</sup>                    | 387    |                                    | 313 × 10 <sup>-6</sup>   |                      |        | Nat. Commun., 2015, 6, 7471               |
| MAPbI <sub>3</sub> film                                                    | TRTS      | 5000                     | 3.5 × 10 <sup>-5</sup>  |         | 0.2 × 10 <sup>-3</sup>                  | 800    | 35                                 | 0.1–1 × 10 <sup>-3</sup> |                      |        | Adv. Funct. Mater. 2015, 25, 6218–6227    |
| MAPbI <sub>3</sub> embed in mesoporous Al <sub>2</sub> O <sub>3</sub>      | TRTS      | 1000                     | 8 × 10 <sup>-5</sup>    |         | 0.4/pluse                               | 796    | 20                                 | 0.283                    |                      |        | J. Am. Chem. Soc. 2014, 136, 5189–5192    |
| MAPbI <sub>3</sub> embed in mesoporous Al <sub>2</sub> O <sub>3</sub>      | TRTS      | 1100                     | 1E-3                    | 2500 ps | 6E-3~0.32                               | 550    | 11.6                               | 0.288                    |                      |        | Adv. Mater. 2014, 26, 1584–1589           |
| MAPbI <sub>3</sub> single crystal                                          | TRTS      | 1000                     | 1E-3                    | 1000ps  | 0.08-0.14                               | 400    | 800                                |                          | 0.05–0.08            |        | Energy Environ. Sci. 2015, 8, 3700–3707   |

|                                                                                                         |      |                        |     |                                                                |     |          |    |      |                      |                                          |
|---------------------------------------------------------------------------------------------------------|------|------------------------|-----|----------------------------------------------------------------|-----|----------|----|------|----------------------|------------------------------------------|
| 1-MAPbI <sub>3</sub> film and MAPbI <sub>3</sub> in mesoporous Al <sub>2</sub> O <sub>3</sub> scaffolds | TRMC | 8.45 × 10 <sup>9</sup> | 3   |                                                                | 410 | 3        | 1  |      |                      | J. Am. Chem. Soc. 2014, 136, 5189–5192   |
| 2-MAPbI <sub>3</sub> film                                                                               | TRMC | 10                     | 5–8 |                                                                | 355 | 20<br>10 |    |      |                      | J. Am. Chem. Soc. 2014, 136, 13818–13825 |
| MAPbI <sub>x</sub> Cl <sub>3-x</sub> films                                                              | TRMC | 10                     |     | 10 <sup>9</sup> to 10 <sup>13</sup><br>photons/cm <sup>2</sup> | 600 | 30       |    | 10   | 5 × 10 <sup>14</sup> | J. Phys. Chem. Lett. 2015, 6, 3082–3090  |
| MAPbI <sub>3</sub> single crystal                                                                       | TRMC | 10                     | 3.5 | 4 × 10 <sup>12</sup><br>photons/cm <sup>2</sup>                | 405 |          | 15 | > 50 |                      | J. Phys. Chem. Lett., 2016, 7, 923–929   |
